# Supplementary material for: Technical note: A microcontroller-based automatic rain sampler for stable isotope studies
Source: Copernicus journal article supplement (doi:10.5194/hess-23-2637-2019), 2019-06-19
Supplement: Supplementary file 1 [file hess-23-2637-2019-supplement.zip]

## Bill of materials

| Item                                         | Dimensions            | Amount | Item-No.     | Unit price [€] | Source [link]                                                                                                                                                                                                                                                                                                                                                                                             | Comment                            |
|----------------------------------------------|-----------------------|--------|--------------|----------------|-----------------------------------------------------------------------------------------------------------------------------------------------------------------------------------------------------------------------------------------------------------------------------------------------------------------------------------------------------------------------------------------------------------|------------------------------------|
| <b>Distribution unit</b>                     |                       |        |              |                |                                                                                                                                                                                                                                                                                                                                                                                                           |                                    |
| Compression spring                           | 111 [N]               | 1      | 5932A        | 3.07           | <a href="http://shop.biegex.de/product_info.php?info=p1365_5932a---druckfeder.html">http://shop.biegex.de/product_info.php?info=p1365_5932a---druckfeder.html</a>                                                                                                                                                                                                                                         |                                    |
| Shaft seal                                   | 12 x 18 x 3 [mm]      | 1      | 435012018032 | 1.83           | <a href="https://www.hug-technik.com/shop/product_info.php?info=p8006_wellendichtring-12-18-3-typ-a-of-ri-nbr.html">https://www.hug-technik.com/shop/product_info.php?info=p8006_wellendichtring-12-18-3-typ-a-of-ri-nbr.html</a>                                                                                                                                                                         |                                    |
| O-ring                                       | 5 x 1 [mm]            | 4      | 4300500100   | 0.30           | <a href="https://www.hug-technik.com/shop/product_info.php?info=p2343_praezisions-o-ring-5-00-x-1-00-mm-nbr70.html">https://www.hug-technik.com/shop/product_info.php?info=p2343_praezisions-o-ring-5-00-x-1-00-mm-nbr70.html</a>                                                                                                                                                                         |                                    |
| O-ring                                       | 22 x 3 [mm]           | 1      | 4302200300   | 0.63           | <a href="https://www.hug-technik.com/shop/product_info.php?info=p2640_praezisions-o-ring-22-00-x-3-00-mm-nbr70.html">https://www.hug-technik.com/shop/product_info.php?info=p2640_praezisions-o-ring-22-00-x-3-00-mm-nbr70.html</a>                                                                                                                                                                       |                                    |
| O-ring                                       | 56 x 1.5 [mm]         | 1      | 4305600150   | 1.20           | <a href="https://www.hug-technik.com/shop/product_info.php?info=p20467_praezisions-o-ring-56-00-x-1-50-mm-nbr70.html">https://www.hug-technik.com/shop/product_info.php?info=p20467_praezisions-o-ring-56-00-x-1-50-mm-nbr70.html</a>                                                                                                                                                                     |                                    |
| O-ring                                       | 85 x 3 [mm]           | 1      | 4308500300   | 1.70           | <a href="https://www.hug-technik.com/shop/product_info.php?info=p3209_praezisions-o-ring-85-00-x-3-00-mm-nbr70.html">https://www.hug-technik.com/shop/product_info.php?info=p3209_praezisions-o-ring-85-00-x-3-00-mm-nbr70.html</a>                                                                                                                                                                       |                                    |
| O-ring                                       | 34 x 2 [mm]           | 1      | 4303400200   | 0.77           | <a href="https://www.hug-technik.com/shop/product_info.php?info=p2779_praezisions-o-ring-34-00-x-2-00-mm-nbr70.html">https://www.hug-technik.com/shop/product_info.php?info=p2779_praezisions-o-ring-34-00-x-2-00-mm-nbr70.html</a>                                                                                                                                                                       |                                    |
| Stepper motor                                | 77:1 Gearbox          | 1      | PHI-3334_0   | 88.90          | <a href="https://www.phidgets.com/?tier=3&amp;catid=24&amp;pcid=21&amp;prodid=353">https://www.phidgets.com/?tier=3&amp;catid=24&amp;pcid=21&amp;prodid=353</a>                                                                                                                                                                                                                                           |                                    |
| Electronic cable, PUR, shielded <sup>1</sup> | 1 [m]                 | 1      | PUR 4X0,5 5  | 15.70          | <a href="https://www.reichelt.de/PUR-cables/PUR-4X0-5-5/3/index.html?ACTION=3&amp;LA=446&amp;ARTICLE=150341&amp;GROUPID=7697&amp;artnr=PUR+4X0%2C5+5&amp;SEARCH=PUR%2B4X0%252C5%2B5&amp;trstct=pos_0">https://www.reichelt.de/PUR-cables/PUR-4X0-5-5/3/index.html?ACTION=3&amp;LA=446&amp;ARTICLE=150341&amp;GROUPID=7697&amp;artnr=PUR+4X0%2C5+5&amp;SEARCH=PUR%2B4X0%252C5%2B5&amp;trstct=pos_0</a>     |                                    |
| Butt connector                               | 0.5–1.0 [mm²]         | 5      | STV-R        | 0.04           | <a href="https://www.reichelt.de/Flat-Plugs/STV-R/3/index.html?ACTION=3&amp;LA=446&amp;ARTICLE=19836&amp;GROUPID=7475&amp;artnr=STV-R&amp;SEARCH=STV-R&amp;trstct=pos_0">https://www.reichelt.de/Flat-Plugs/STV-R/3/index.html?ACTION=3&amp;LA=446&amp;ARTICLE=19836&amp;GROUPID=7475&amp;artnr=STV-R&amp;SEARCH=STV-R&amp;trstct=pos_0</a>                                                               |                                    |
| Round connector                              | 4-pin, IP68           | 1      | LUM 0332-04  | 6.10           | <a href="https://www.reichelt.de/Circular-Connectors/LUM-0332-04/3/index.html?ACTION=3&amp;LA=446&amp;ARTICLE=116121&amp;GROUPID=7506&amp;artnr=LUM+0332-04&amp;SEARCH=LUM%2B0332-04&amp;trstct=pos_0">https://www.reichelt.de/Circular-Connectors/LUM-0332-04/3/index.html?ACTION=3&amp;LA=446&amp;ARTICLE=116121&amp;GROUPID=7506&amp;artnr=LUM+0332-04&amp;SEARCH=LUM%2B0332-04&amp;trstct=pos_0</a>   |                                    |
| Self-adhesive seal (neoprene rubber, CR)     | 121 x 121 x 2 [mm]    | 1      | n.a.         | 1.20           | <a href="https://www.fugendichtband24.de/Neopren-Zellkautschuk-Matten-2mm-Staerke-einseitig-selbstklebend-diverse-Abmessungen.htm">https://www.fugendichtband24.de/Neopren-Zellkautschuk-Matten-2mm-Staerke-einseitig-selbstklebend-diverse-Abmessungen.htm</a>                                                                                                                                           | see technical drawings             |
| PTFE sheet for rotor                         | 121 x 121 x 15 [mm]   | 1      | PTFEPLATTE15 | 15.81          | <a href="https://www.duelplast.de/PTFE-Platten-15mm.html">https://www.duelplast.de/PTFE-Platten-15mm.html</a>                                                                                                                                                                                                                                                                                             |                                    |
| PVC-U sheet for stator                       | 121 x 121 x 15 [mm]   | 1      | PVCPLATTE15  | 2.55           | <a href="https://www.duelplast.de/PVC-Platten-15mm.html">https://www.duelplast.de/PVC-Platten-15mm.html</a>                                                                                                                                                                                                                                                                                               | see technical drawings             |
| PVC-U sheet for motor housing lid            | 100 x 100 x 25 [mm]   | 1      | PVCPLATTE25  | 2.90           | <a href="https://www.duelplast.de/PVC-Platten-25mm.html">https://www.duelplast.de/PVC-Platten-25mm.html</a>                                                                                                                                                                                                                                                                                               |                                    |
| Straight push-in fitting                     | M7, 6 [mm]            | 38     | IQSM M76 I   | 1.56           | <a href="https://www.landefeld.de/cgi/main.cgi?DISPLAY=suche&amp;filter_suche_suchstring=IQSM+M76+I&amp;search-submit=Suchen">https://www.landefeld.de/cgi/main.cgi?DISPLAY=suche&amp;filter_suche_suchstring=IQSM+M76+I&amp;search-submit=Suchen</a>                                                                                                                                                     |                                    |
| SNAP cable grommet                           | PG9, IP66/67          | 1      | KAB SNAP 9   | 0.59           | <a href="https://www.reichelt.de/Cable-Feedthrough/KAB-SNAP-9/3/index.html?ACTION=3&amp;LA=446&amp;ARTICLE=53633&amp;GROUPID=5744&amp;artnr=KAB+SNAP+9&amp;SEARCH=KAB%2BSNAP%2B9&amp;trstct=pos_0">https://www.reichelt.de/Cable-Feedthrough/KAB-SNAP-9/3/index.html?ACTION=3&amp;LA=446&amp;ARTICLE=53633&amp;GROUPID=5744&amp;artnr=KAB+SNAP+9&amp;SEARCH=KAB%2BSNAP%2B9&amp;trstct=pos_0</a>           |                                    |
| <b>Bottles and related components</b>        |                       |        |              |                |                                                                                                                                                                                                                                                                                                                                                                                                           |                                    |
| HDPE wide mouth bottles                      | 500 [mL]              | 18     | 7696145      | 4.77           | <a href="https://www.thgeyer-lab.com/fileadmin/user_upload/LLG-VMGE-Katalog-PDFs/2018-2020/DE/ThGeyer_Catalogue_2018_DE_74.pdf">https://www.thgeyer-lab.com/fileadmin/user_upload/LLG-VMGE-Katalog-PDFs/2018-2020/DE/ThGeyer_Catalogue_2018_DE_74.pdf</a>                                                                                                                                                 |                                    |
| SNAP cable grommet                           | PG9, IP66/67          | 36     | KAB SNAP 9   | 0.59           | <a href="https://www.reichelt.de/Cable-Feedthrough/KAB-SNAP-9/3/index.html?ACTION=3&amp;LA=446&amp;ARTICLE=53633&amp;GROUPID=5744&amp;artnr=KAB+SNAP+9&amp;SEARCH=KAB%2BSNAP%2B9&amp;trstct=pos_0">https://www.reichelt.de/Cable-Feedthrough/KAB-SNAP-9/3/index.html?ACTION=3&amp;LA=446&amp;ARTICLE=53633&amp;GROUPID=5744&amp;artnr=KAB+SNAP+9&amp;SEARCH=KAB%2BSNAP%2B9&amp;trstct=pos_0</a>           |                                    |
| LDPE tubing                                  | 6 x 4 [mm], 1 [m]     | 36     | 9.205 465    | 1.30           | <a href="https://shop.haeberle-lab.de/info1074_lang_EN.htm?UID=55005acd0b8d000000000000">https://shop.haeberle-lab.de/info1074_lang_EN.htm?UID=55005acd0b8d000000000000</a>                                                                                                                                                                                                                               | exact length depends on box design |
| <b>Control unit</b>                          |                       |        |              |                |                                                                                                                                                                                                                                                                                                                                                                                                           |                                    |
| Booster pack driver                          |                       | 1      | 296-38354-ND | 24.18          | <a href="https://www.digikey.de/products/en?keywords=296-38354-ND">https://www.digikey.de/products/en?keywords=296-38354-ND</a>                                                                                                                                                                                                                                                                           |                                    |
| Development board                            |                       | 1      | 296-42080-ND | 16.00          | <a href="https://www.digikey.de/products/en?keywords=296-42080-ND">https://www.digikey.de/products/en?keywords=296-42080-ND</a>                                                                                                                                                                                                                                                                           |                                    |
| Battery holder                               | 2 Mignon (AA)         | 1      | SBH321AS     | 1.79           | <a href="https://www.digikey.de/products/en?keywords=SBH321AS">https://www.digikey.de/products/en?keywords=SBH321AS</a>                                                                                                                                                                                                                                                                                   |                                    |
| Battery holder                               | 8 Mignon (AA)         | 1      | BH28AAW      | 1.79           | <a href="https://www.digikey.de/products/en?keywords=BH28AAW">https://www.digikey.de/products/en?keywords=BH28AAW</a>                                                                                                                                                                                                                                                                                     |                                    |
| Prototyping circuit board                    | 160 x 100 [mm]        | 1      | 529593 - 62  | 3.60           | <a href="https://www.conrad.com/ce/en/product/529593/?insert=62&amp;insertNoDeeplink&amp;productname=WR-Rademacher-VK-C-811-5-Solder-Point-Grid-Plate-L-x-W-160-mm-x-100-mm-HP">https://www.conrad.com/ce/en/product/529593/?insert=62&amp;insertNoDeeplink&amp;productname=WR-Rademacher-VK-C-811-5-Solder-Point-Grid-Plate-L-x-W-160-mm-x-100-mm-HP</a>                                                 |                                    |
| Incremental encoder                          |                       | 1      | 447177 - 62  | 4.39           | <a href="https://www.conrad.com/ce/en/product/447177/?insert=62&amp;insertNoDeeplink&amp;productname=Encoder-----Switch-positions-24----360----Bourns">https://www.conrad.com/ce/en/product/447177/?insert=62&amp;insertNoDeeplink&amp;productname=Encoder-----Switch-positions-24----360----Bourns</a>                                                                                                   |                                    |
| Rocker switch                                |                       | 1      | WS R13-244 A | 1.15           | <a href="https://www.reichelt.de/Switches-Rocker/WS-R13-244-A/3/index.html?ACTION=3&amp;LA=446&amp;ARTICLE=105450&amp;GROUPID=7596&amp;artnr=WS+R13-244+A&amp;SEARCH=WS%2BR13-244%2BA&amp;trstct=pos_0">https://www.reichelt.de/Switches-Rocker/WS-R13-244-A/3/index.html?ACTION=3&amp;LA=446&amp;ARTICLE=105450&amp;GROUPID=7596&amp;artnr=WS+R13-244+A&amp;SEARCH=WS%2BR13-244%2BA&amp;trstct=pos_0</a> |                                    |
| Enclosure                                    | 202 x 122 x 75 [mm]   | 1      | 534551 - 62  | 29.47          | <a href="https://www.conrad.com/ce/en/product/534551/?insert=62&amp;insertNoDeeplink&amp;productname=Build-in-casing----202-x-122-x-75----Polycarbonate-PC----Light-grey-RAL-7035">https://www.conrad.com/ce/en/product/534551/?insert=62&amp;insertNoDeeplink&amp;productname=Build-in-casing----202-x-122-x-75----Polycarbonate-PC----Light-grey-RAL-7035</a>                                           |                                    |
| Panel-mounted coupler                        | 4-pin, IP68           | 1      | LUM 0305-04  | 3.99           | <a href="https://www.reichelt.de/Circular-Connectors/LUM-0305-04/3/index.html?ACTION=3&amp;LA=446&amp;ARTICLE=116139&amp;GROUPID=7506&amp;artnr=LUM+0305-04&amp;SEARCH=LUM%2B0305-04&amp;trstct=pos_0">https://www.reichelt.de/Circular-Connectors/LUM-0305-04/3/index.html?ACTION=3&amp;LA=446&amp;ARTICLE=116139&amp;GROUPID=7506&amp;artnr=LUM+0305-04&amp;SEARCH=LUM%2B0305-04&amp;trstct=pos_0</a>   |                                    |
| Stranded wire <sup>1</sup>                   | 1 x 0.50 [mm²], 1 [m] | 1      | 605628 - 62  | 5.00           | <a href="https://www.conrad.com/de/litze-liy-1-x-050-mm-schwarz-conrad-components-605628-10-m-605628.html?insert=62">https://www.conrad.com/de/litze-liy-1-x-050-mm-schwarz-conrad-components-605628-10-m-605628.html?insert=62</a>                                                                                                                                                                       |                                    |
| Pin header                                   | 2 x 10 [pin]          | 2      | 1401857 - 62 | 1.00           | <a href="https://www.conrad.com/ce/en/product/1401857/?insert=62&amp;insertNoDeeplink&amp;productname=Pin-strip-standard-No-of-rows-2-Pins-per-row-10-FCI-77313-118-20LF-1-pcs">https://www.conrad.com/ce/en/product/1401857/?insert=62&amp;insertNoDeeplink&amp;productname=Pin-strip-standard-No-of-rows-2-Pins-per-row-10-FCI-77313-118-20LF-1-pcs</a>                                                 |                                    |
| Fillister head screws                        | M4 30mm               | 1      | 145925 - 62  | 11.99          | <a href="https://www.conrad.com/ce/en/product/145925/Fillister-head-screws----M4----30-mm----Phillips----NA">https://www.conrad.com/ce/en/product/145925/Fillister-head-screws----M4----30-mm----Phillips----NA</a>                                                                                                                                                                                       |                                    |
| Spacer                                       | M4 20mm               | 4      | 526460 - 62  | 0.80           | <a href="https://www.conrad.com/ce/en/product/526460/Spacer-wo-thread-M4-Polystyrene-Distance-20-mm?queryFromSuggest=true">https://www.conrad.com/ce/en/product/526460/Spacer-wo-thread-M4-Polystyrene-Distance-20-mm?queryFromSuggest=true</a>                                                                                                                                                           |                                    |
| <b>Miscellaneous</b>                         |                       |        |              |                |                                                                                                                                                                                                                                                                                                                                                                                                           |                                    |
| Euro Container with hinge lid                | 80 x 60 x 43.5 [cm]   | 1      | ED 86/42 HG  | 51.00          | <a href="https://www.auer-packaging.com/de/de/Eurobeh%C3%A4lter-mit-Scharnierdeckel/ED-8642-HG.html?color=7001">https://www.auer-packaging.com/de/de/Eurobeh%C3%A4lter-mit-Scharnierdeckel/ED-8642-HG.html?color=7001</a>                                                                                                                                                                                 |                                    |
| Straight push-in fitting                     | R 1/2 [inch], 6 [mm]  | 1      | IQSG 126     | 2.85           | <a href="https://www.landefeld.de/artikel/en/straight-push-in-fitting-r-12mm-6mm-iqs-standard/IQSG-126">https://www.landefeld.de/artikel/en/straight-push-in-fitting-r-12mm-6mm-iqs-standard/IQSG-126</a>                                                                                                                                                                                                 | for funnel connection              |
| Installation key tool                        |                       | 1      | 733307 - 62  | 6.99           | <a href="https://www.conrad.com/ce/en/product/733307/Installation-key-tool-Lumberg-0380-Black-1-pcs?queryFromSuggest=true">https://www.conrad.com/ce/en/product/733307/Installation-key-tool-Lumberg-0380-Black-1-pcs?queryFromSuggest=true</a>                                                                                                                                                           |                                    |

<sup>1</sup> only 1 [m] required

Note: Selected parts that we suggest to purchase from a local hardware store (screws, steel pipes) are not listed here.
