# Supplementary material for: Technical note: A microcontroller-based automatic rain sampler for stable isotope studies
Source: Copernicus journal article supplement (doi:10.5194/hess-23-2637-2019), 2019-06-19
Supplement: Supplementary file 6 [file hess-23-2637-2019-supplement.zip]

Archive with 10 entries (10 files):
- Circuit diagram.pdf
- Operation manual.pdf
- STL files.zip
- hess-23-2637-2019-supplement-title-page.pdf
- Build guide.pdf
- Supplement.docx
- Software upload manual.pdf
- Code.zip
- Bill of materials.pdf
- Technical drawings (distribution unit).pdf
