# Supplementary material for: Technical note: A microcontroller-based automatic rain sampler for stable isotope studies
Source: Copernicus journal article supplement (doi:10.5194/hess-23-2637-2019), 2019-06-19
Supplement: Supplementary file 6 [file hess-23-2637-2019-supplement.zip › Circuit diagram.pdf]

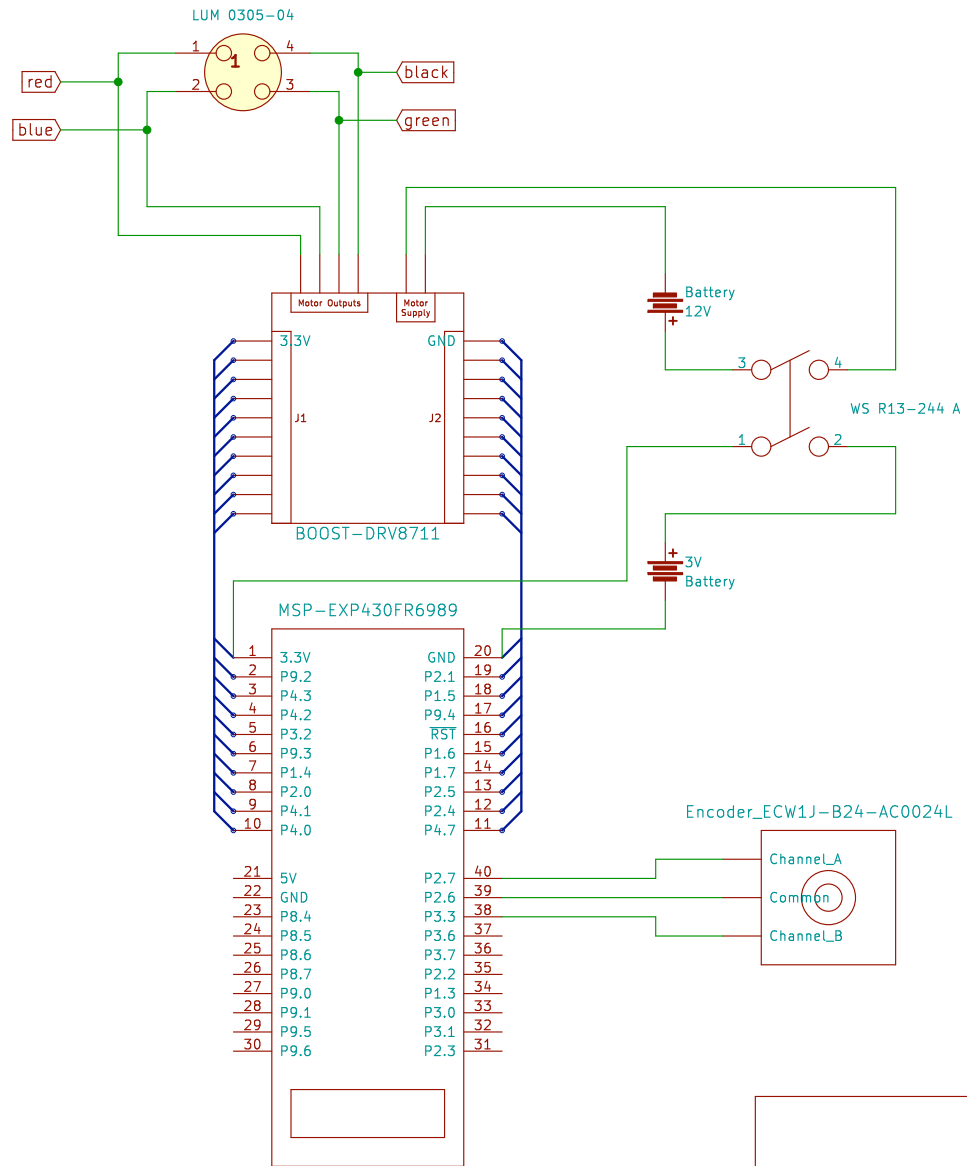

|                                                   |                                         |      |
|---------------------------------------------------|-----------------------------------------|------|
| Sheet: /                                          |                                         |      |
| File: Autosampler.sch                             |                                         |      |
| Title: Watersampler control box – circuit diagram |                                         |      |
| Size: A4                                          | Date: 2018-03-08, Author: Guido Schramm | Rev: |
| KiCad E.D.A. kicad 4.0.7                          | Id: 1/1                                 |      |
