# Supplementary material for: Technical note: A microcontroller-based automatic rain sampler for stable isotope studies
Source: Copernicus journal article supplement (doi:10.5194/hess-23-2637-2019), 2019-06-19
Supplement: Supplementary file 6 [file hess-23-2637-2019-supplement.zip › hess-23-2637-2019-supplement-title-page.pdf]

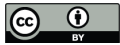

## *Supplement of*

# **Technical note: A microcontroller-based automatic rain sampler for stable isotope studies**

**Nils Michelsen et al.**

*Correspondence to:* Nils Michelsen ([michelsen@geo.tu-darmstadt.de](mailto:michelsen@geo.tu-darmstadt.de))

- [hess-23-2637-2019-supplement-title-page.pdf](#)
- [Bill of materials.pdf](#)
- [Build guide.pdf](#)
- [Circuit diagram.pdf](#)
- [Code.zip](#)
- [Operation manual.pdf](#)
- [STL files.zip](#)
- [Software upload manual.pdf](#)
- [Supplement.docx](#)
- [Technical drawings \(distribution unit\).pdf](#)

The copyright of individual parts of the supplement might differ from the CC BY 4.0 License.
