# Supplementary material for: Technical note: A microcontroller-based automatic rain sampler for stable isotope studies
Source: Copernicus journal article supplement (doi:10.5194/hess-23-2637-2019), 2019-06-19
Supplement: Supplementary file 6 [file hess-23-2637-2019-supplement.zip › Technical drawings (distribution unit).pdf]

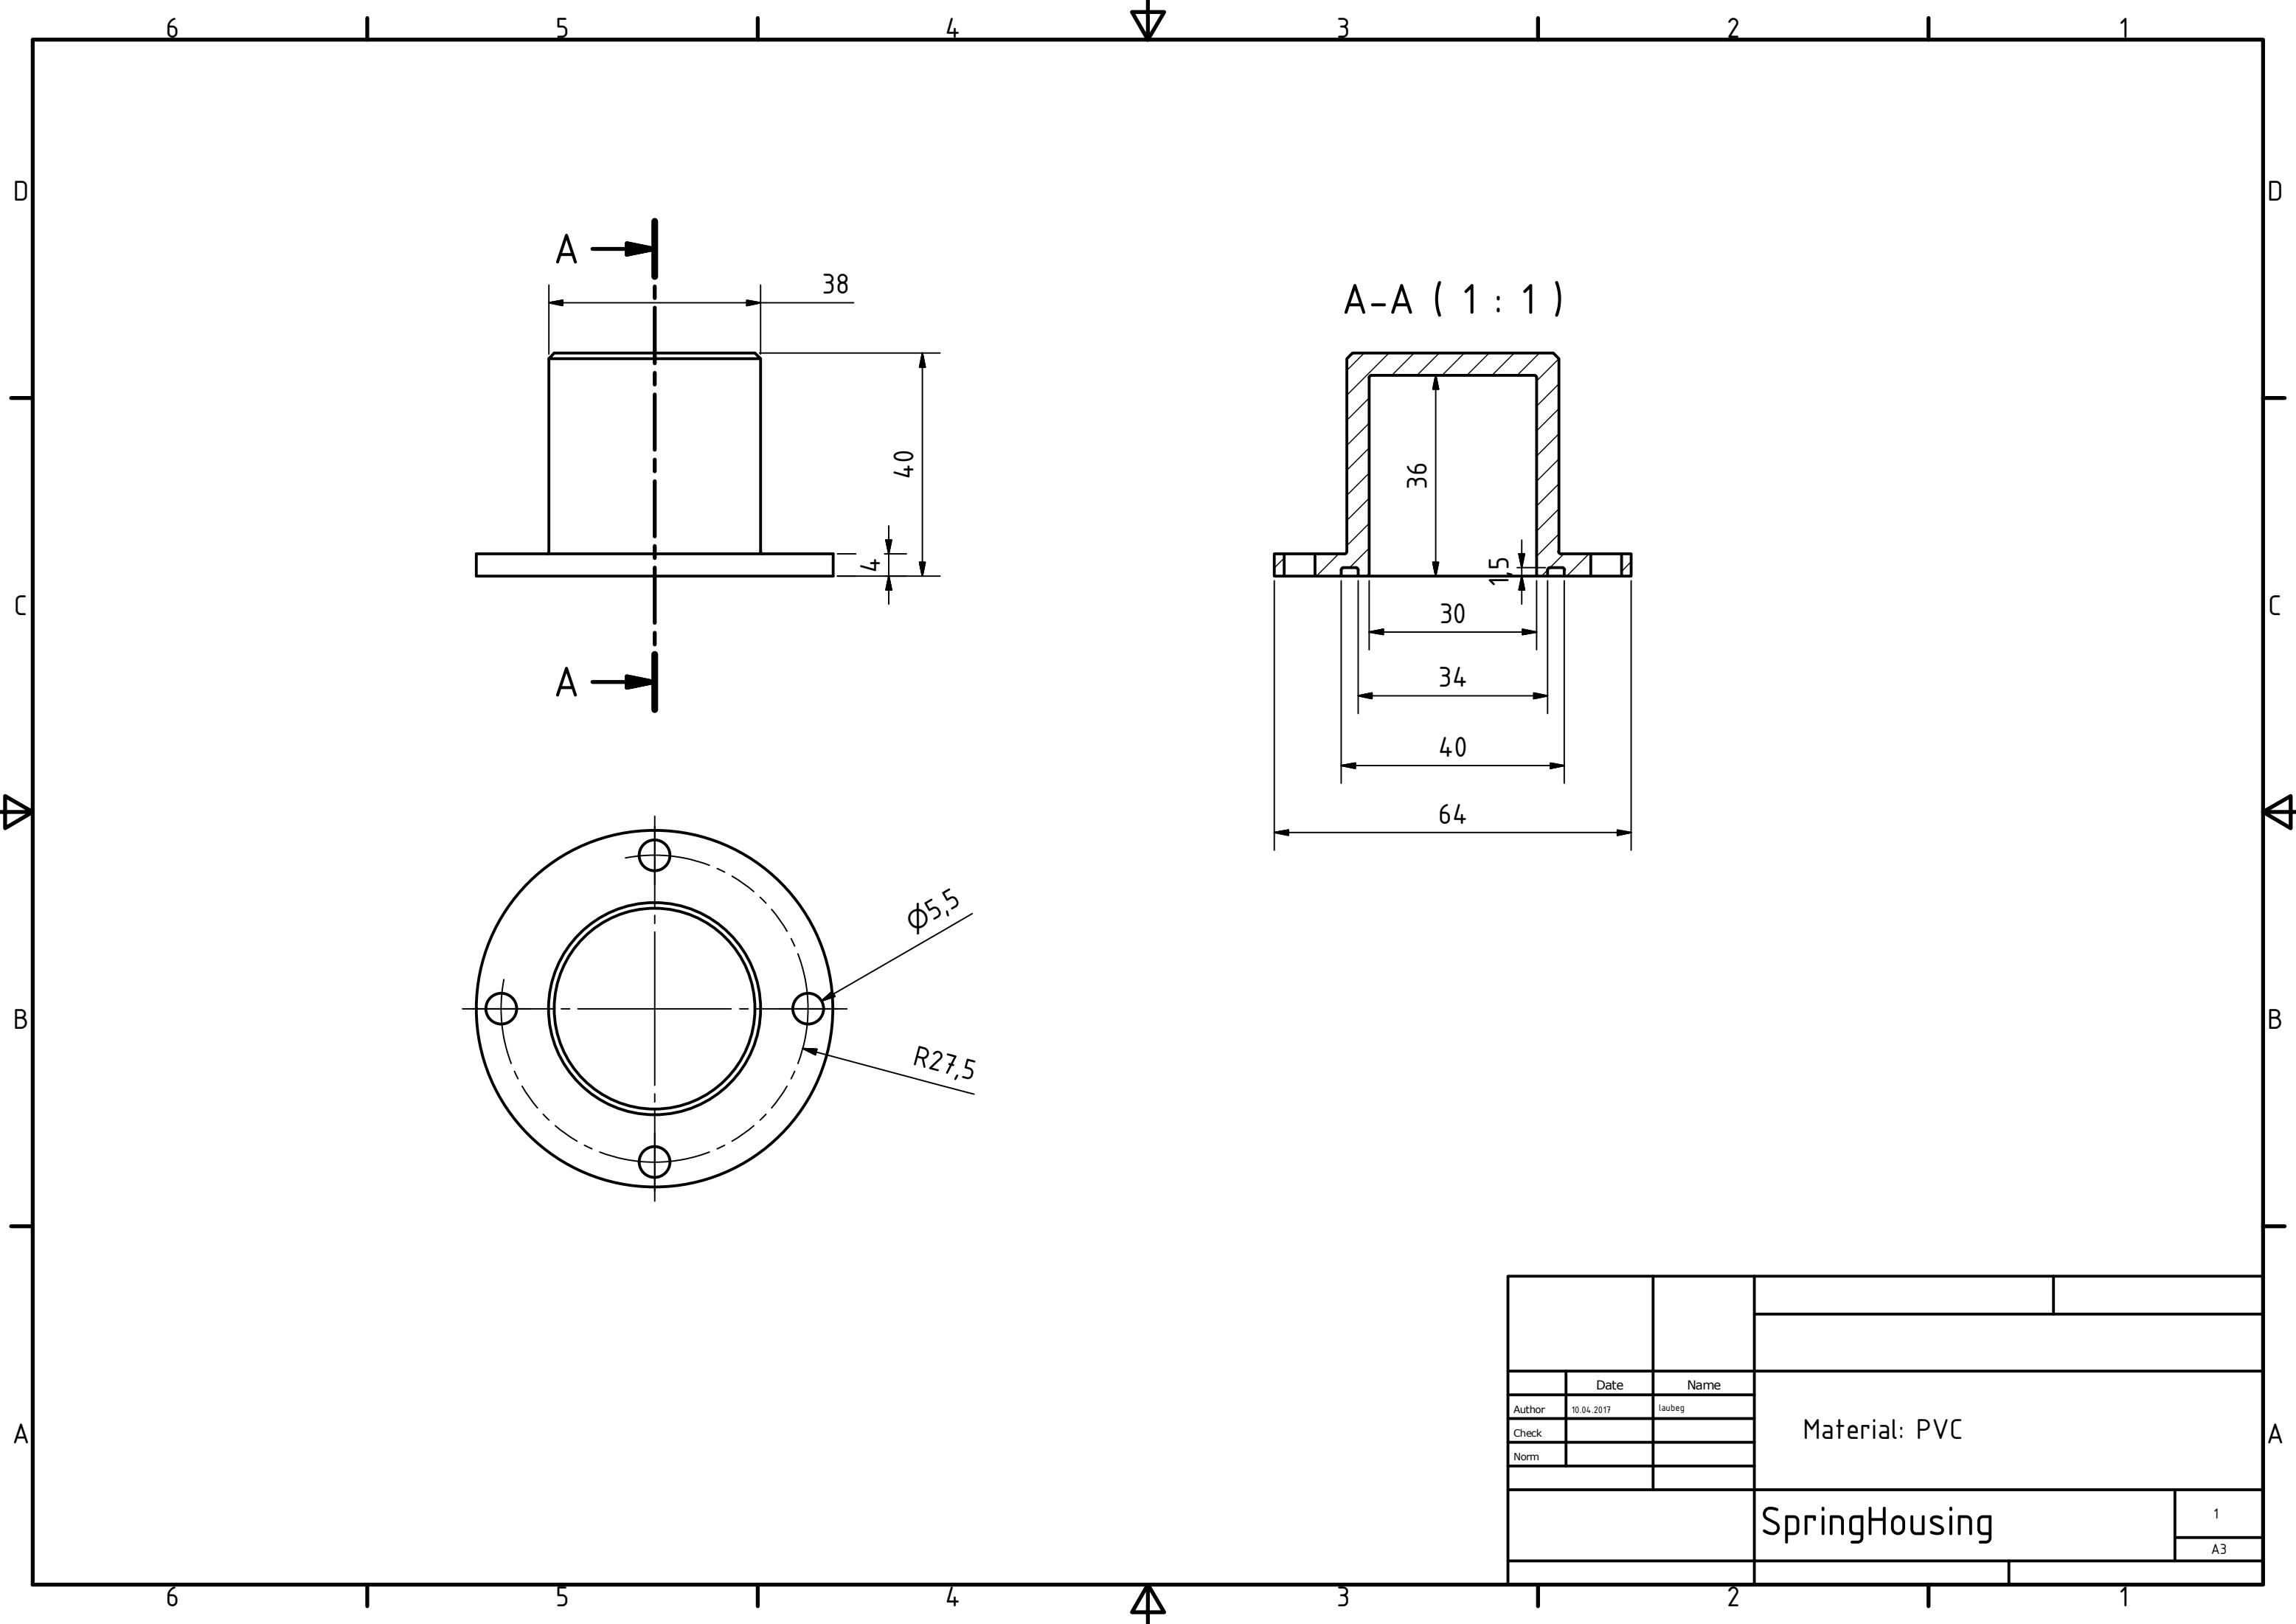

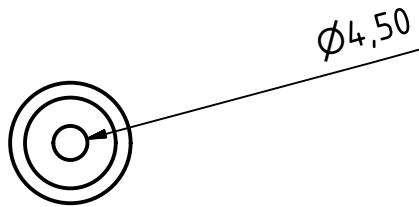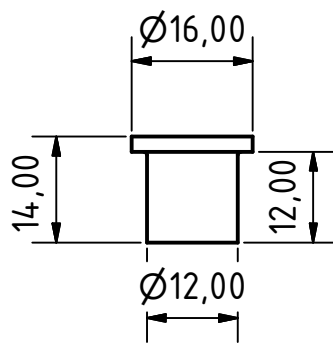

|        |            |                                      |    |  |
|--------|------------|--------------------------------------|----|--|
|        |            |                                      |    |  |
|        |            |                                      |    |  |
|        |            | <div>Material: Stainless Steel</div> |    |  |
|        | Date       | Name                                 |    |  |
| Author | 10.04.2017 | laubeg                               |    |  |
| Check  |            |                                      |    |  |
| Norm   |            |                                      |    |  |
|        |            |                                      |    |  |
|        |            | <div>SpringGuide</div>               | 1  |  |
|        |            |                                      | A4 |  |
|        |            |                                      |    |  |

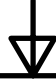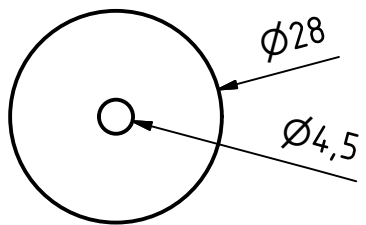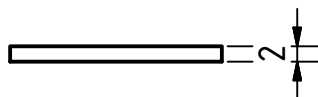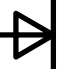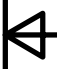

|        |            |                           |        |  |
|--------|------------|---------------------------|--------|--|
|        |            |                           |        |  |
|        |            |                           |        |  |
|        |            | Material: Stainless Steel |        |  |
|        | Date       |                           | Name   |  |
| Author | 10.04.2017 |                           | laubeg |  |
| Check  |            |                           |        |  |
| Norm   |            |                           |        |  |
|        |            |                           |        |  |
|        |            | SpringWasher              | 1      |  |
|        |            |                           | A4     |  |
|        |            |                           |        |  |

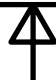

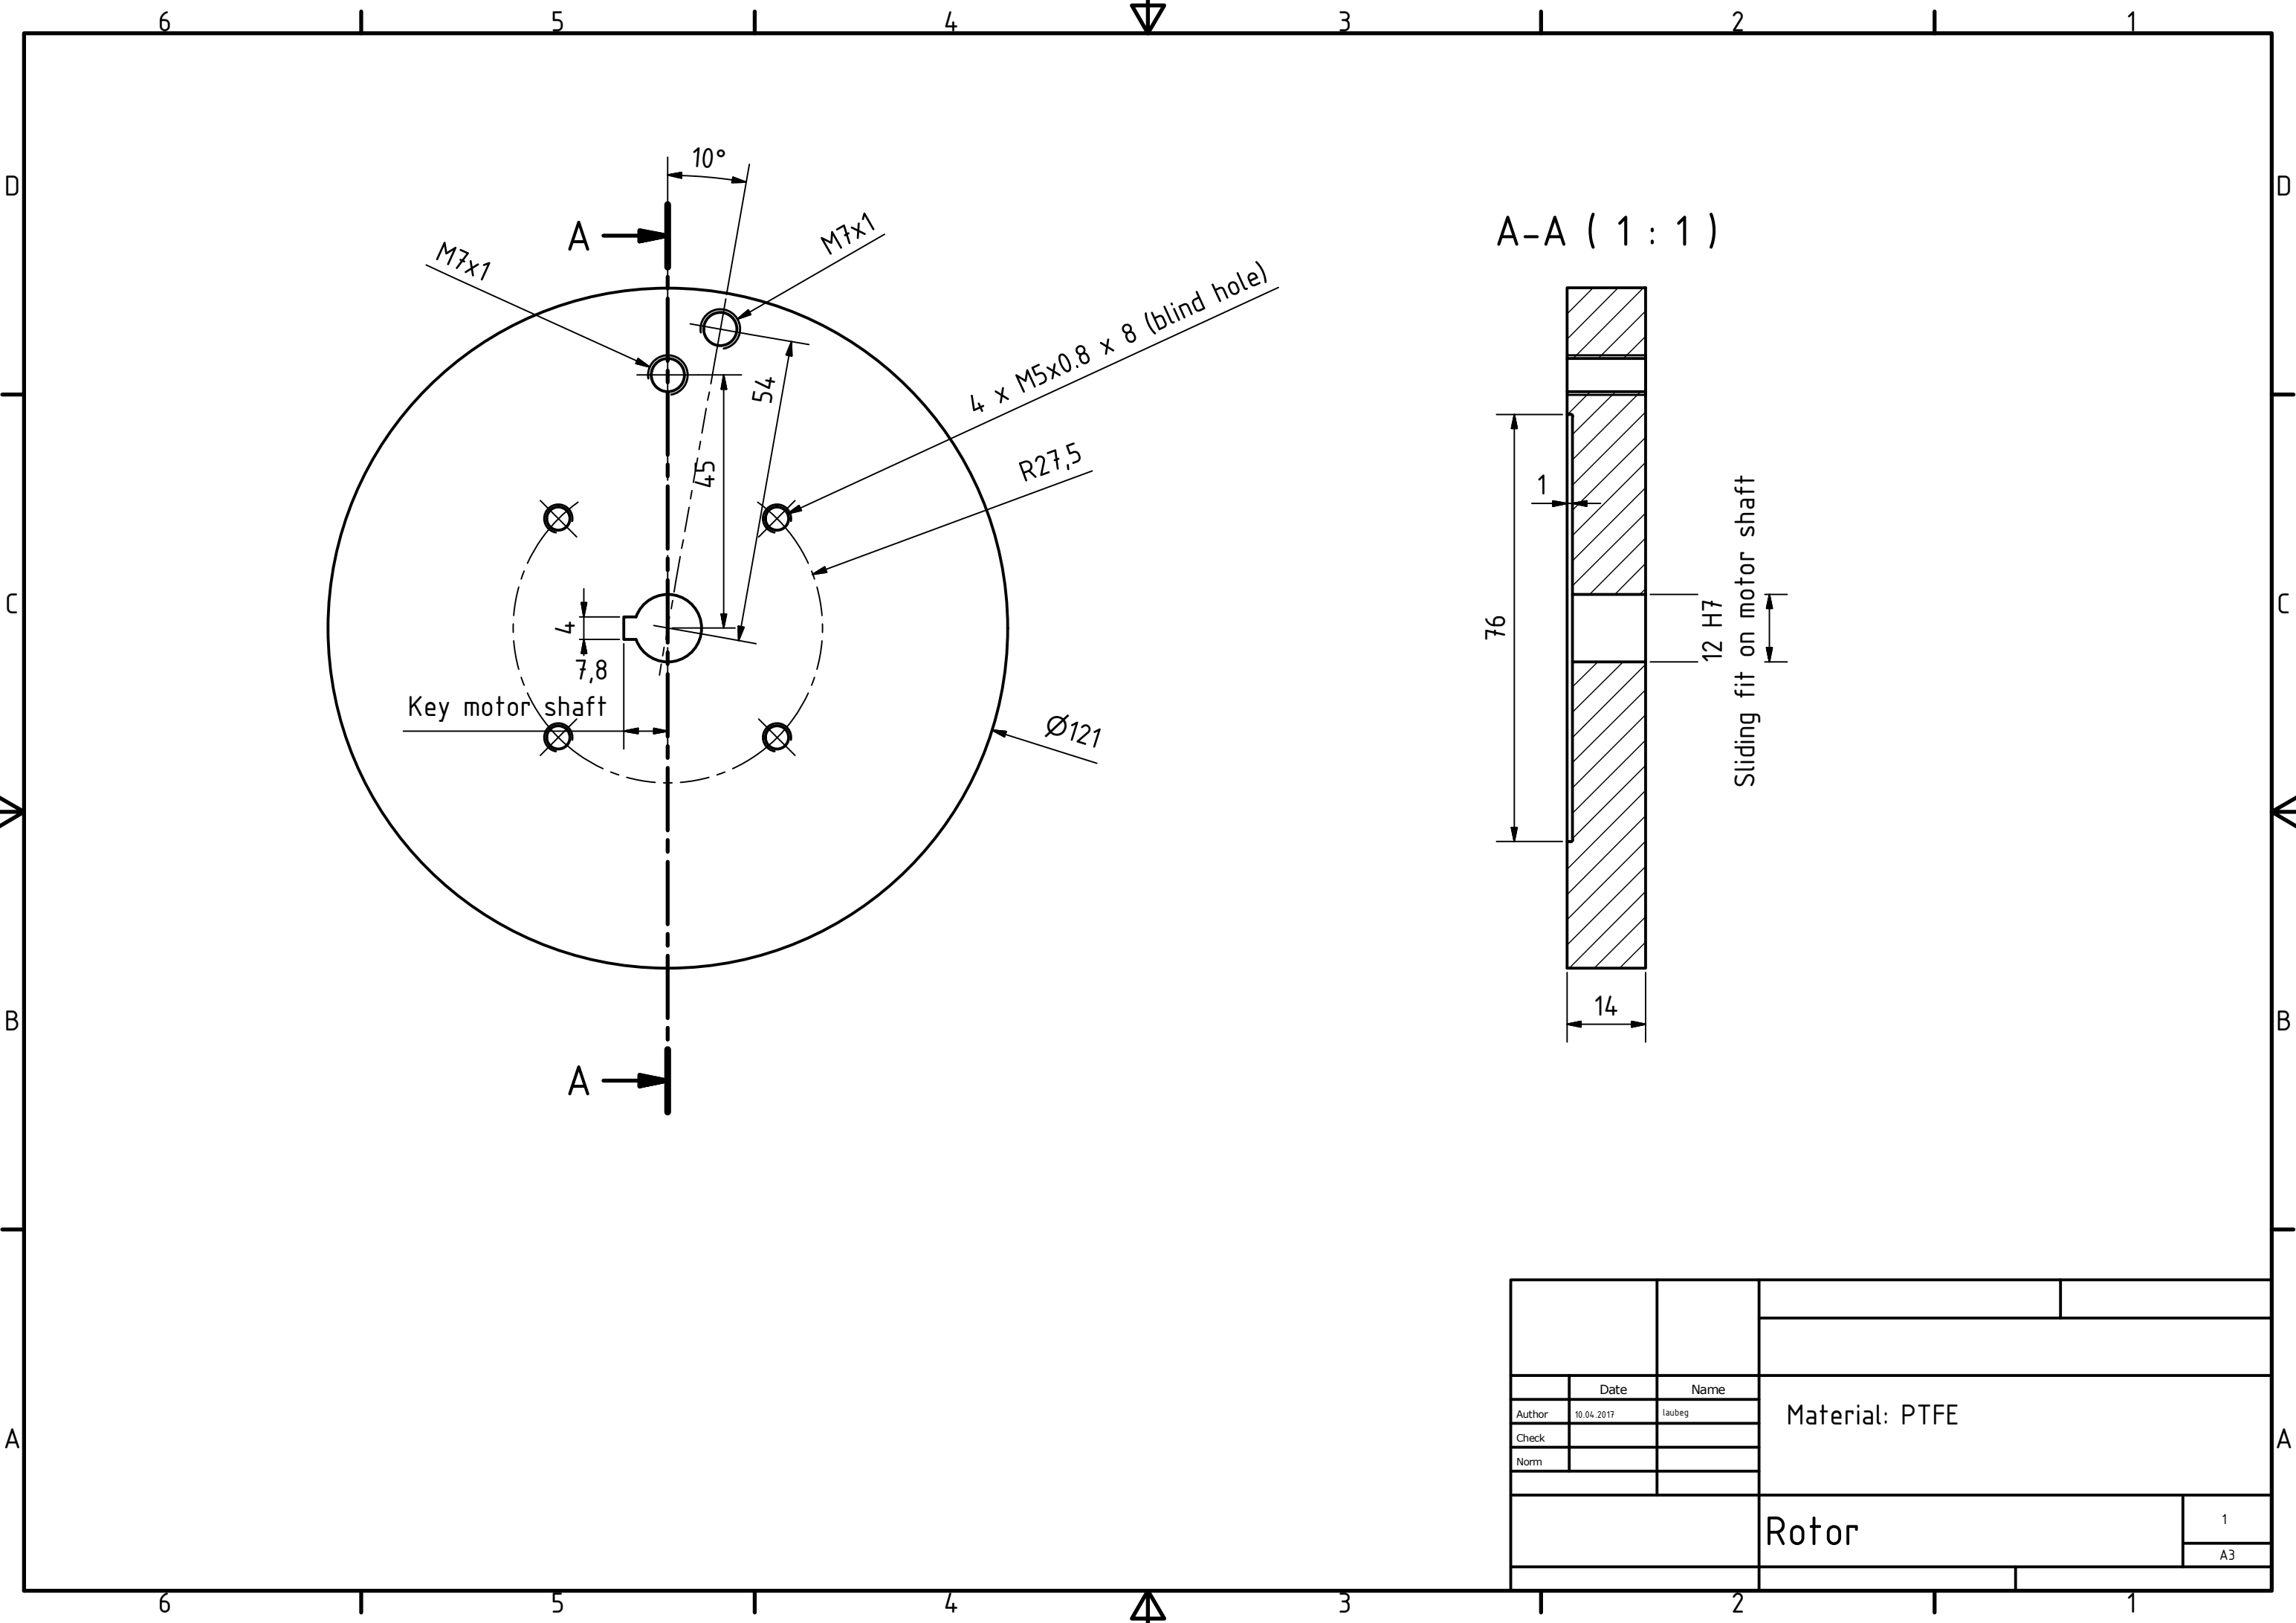

|        |            |        |                |  |    |
|--------|------------|--------|----------------|--|----|
|        |            |        |                |  |    |
|        |            |        |                |  |    |
|        | Date       | Name   | Material: PTFE |  |    |
| Author | 10.04.2017 | laubeg |                |  |    |
| Check  |            |        |                |  |    |
| Norm   |            |        |                |  |    |
|        |            |        |                |  |    |
|        |            |        | Rotor          |  | 1  |
|        |            |        |                |  | A3 |
|        |            |        |                |  |    |

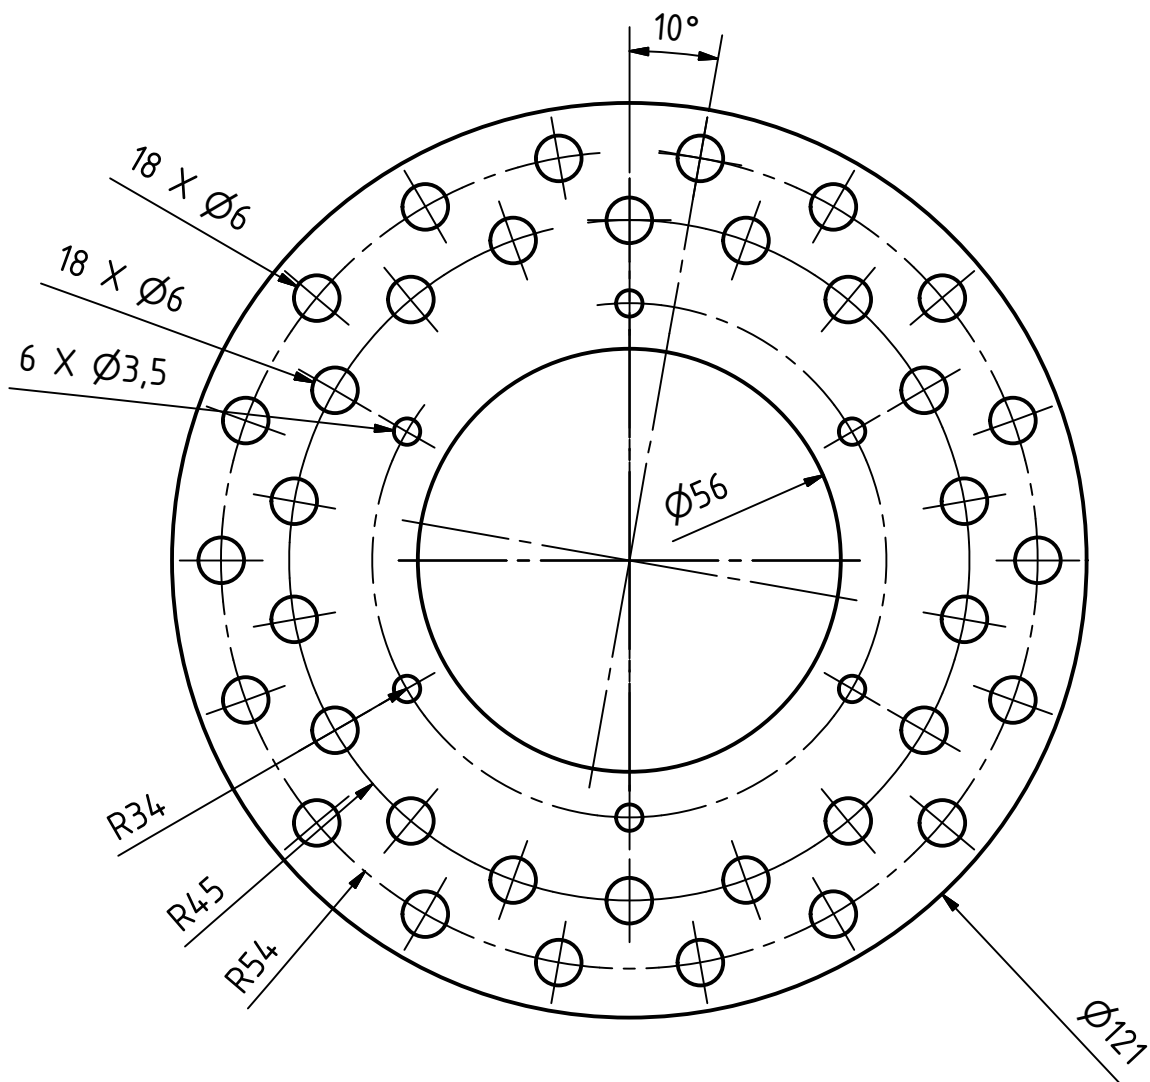

|        |            |                                        |  |
|--------|------------|----------------------------------------|--|
|        |            |                                        |  |
|        |            |                                        |  |
|        | Date       | Name                                   |  |
| Author | 25.04.2017 | laubeg                                 |  |
| Check  |            |                                        |  |
| Norm   |            |                                        |  |
|        |            |                                        |  |
|        |            | Material: Neopren (CR) Foam            |  |
|        |            | SealingWithoutCountersink <sup>1</sup> |  |
|        |            | A4                                     |  |

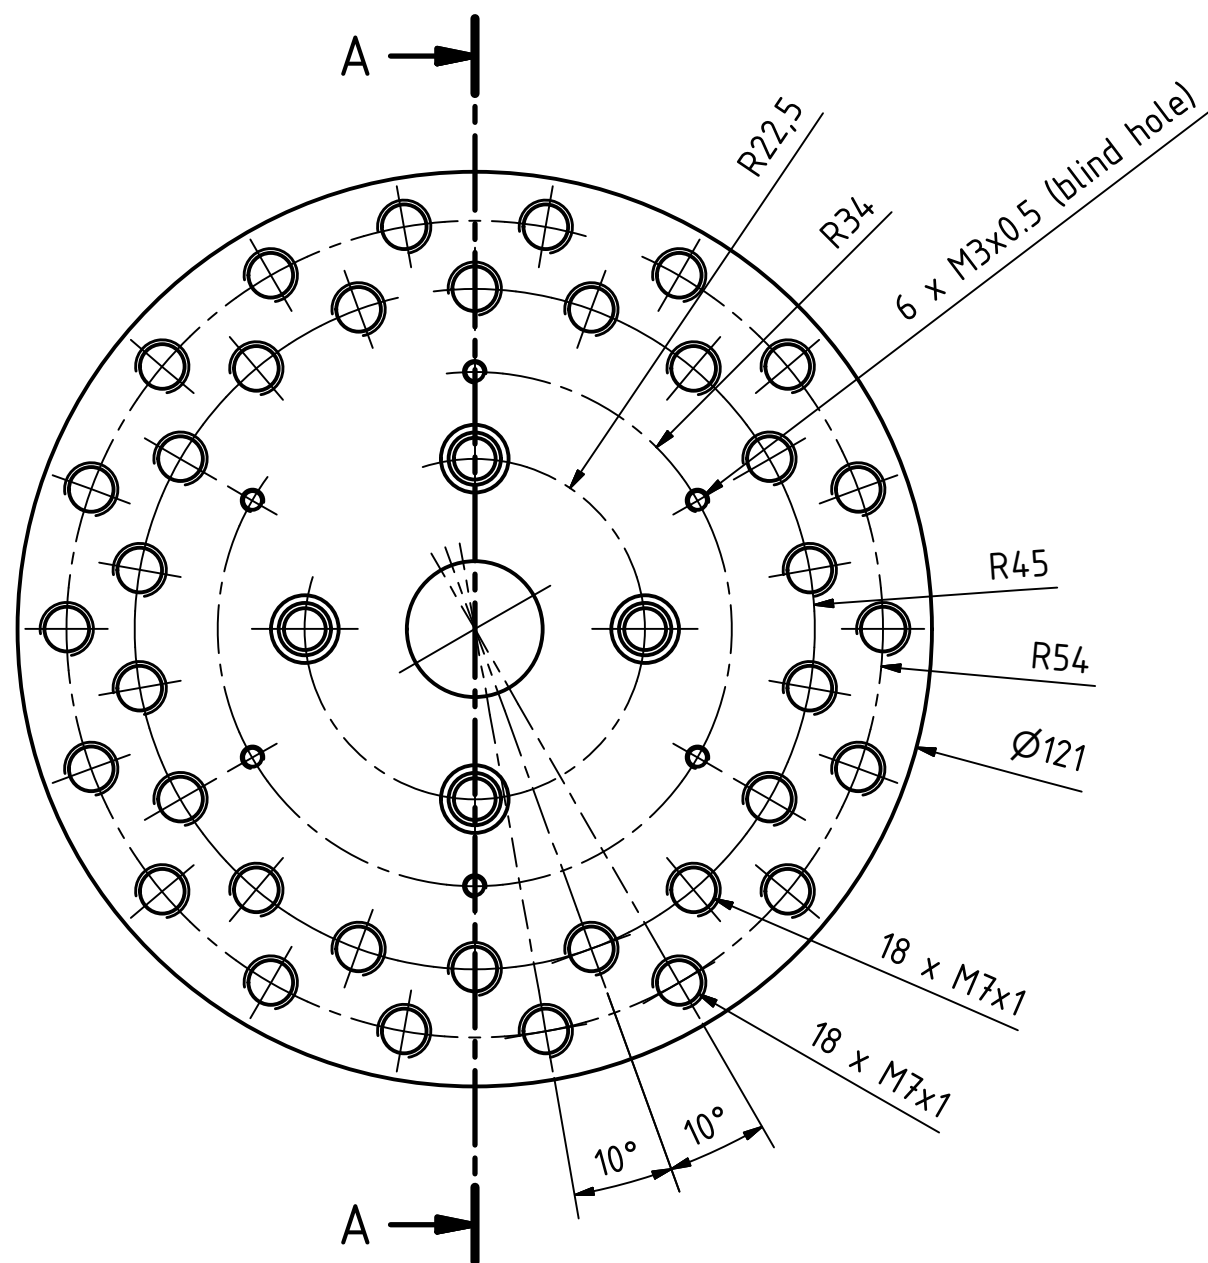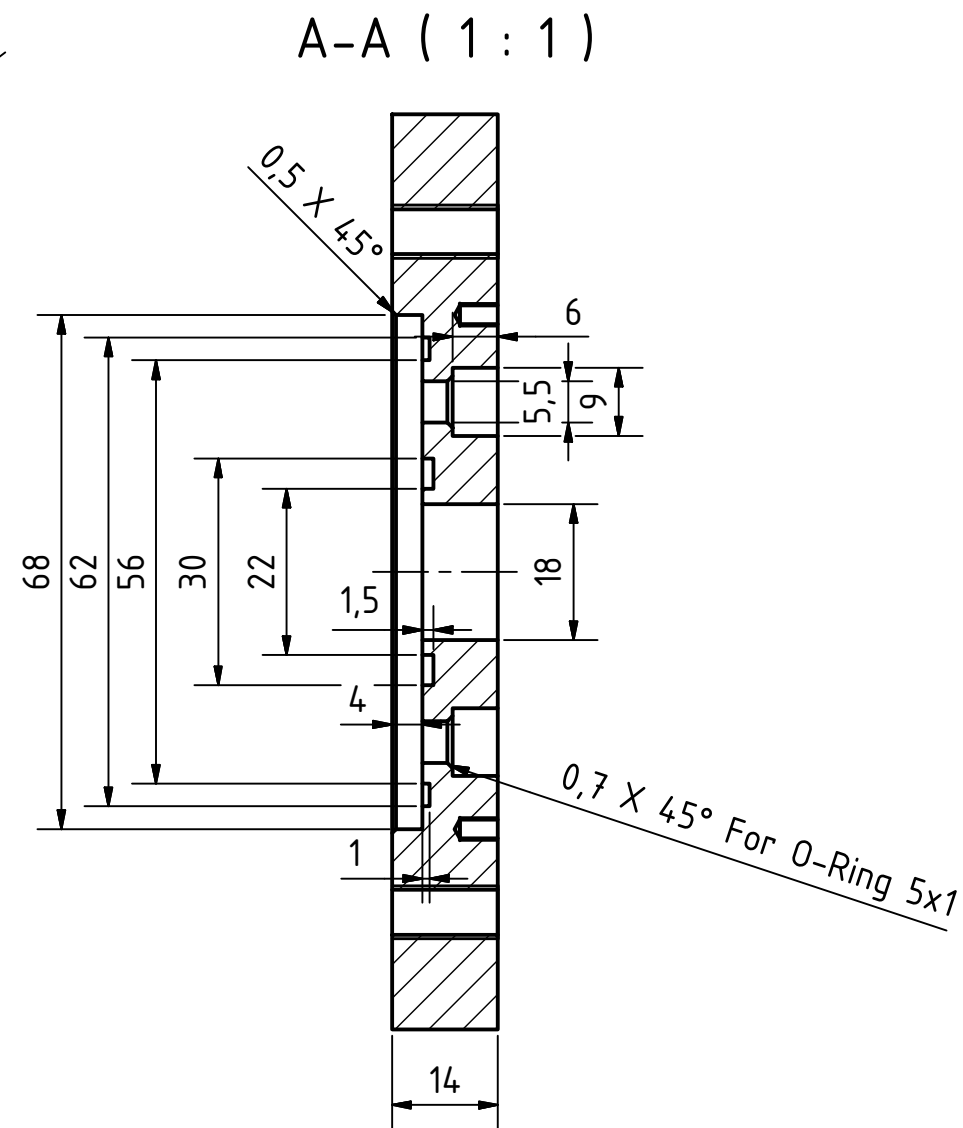

|        |            |        |               |  |    |
|--------|------------|--------|---------------|--|----|
|        |            |        |               |  |    |
|        |            |        |               |  |    |
|        | Date       | Name   | Material: PVC |  |    |
| Author | 10.04.2017 | laubeg |               |  |    |
| Check  |            |        |               |  |    |
| Norm   |            |        |               |  |    |
|        |            |        |               |  |    |
|        |            |        | Stator        |  | 1  |
|        |            |        |               |  | A3 |
|        |            |        |               |  |    |

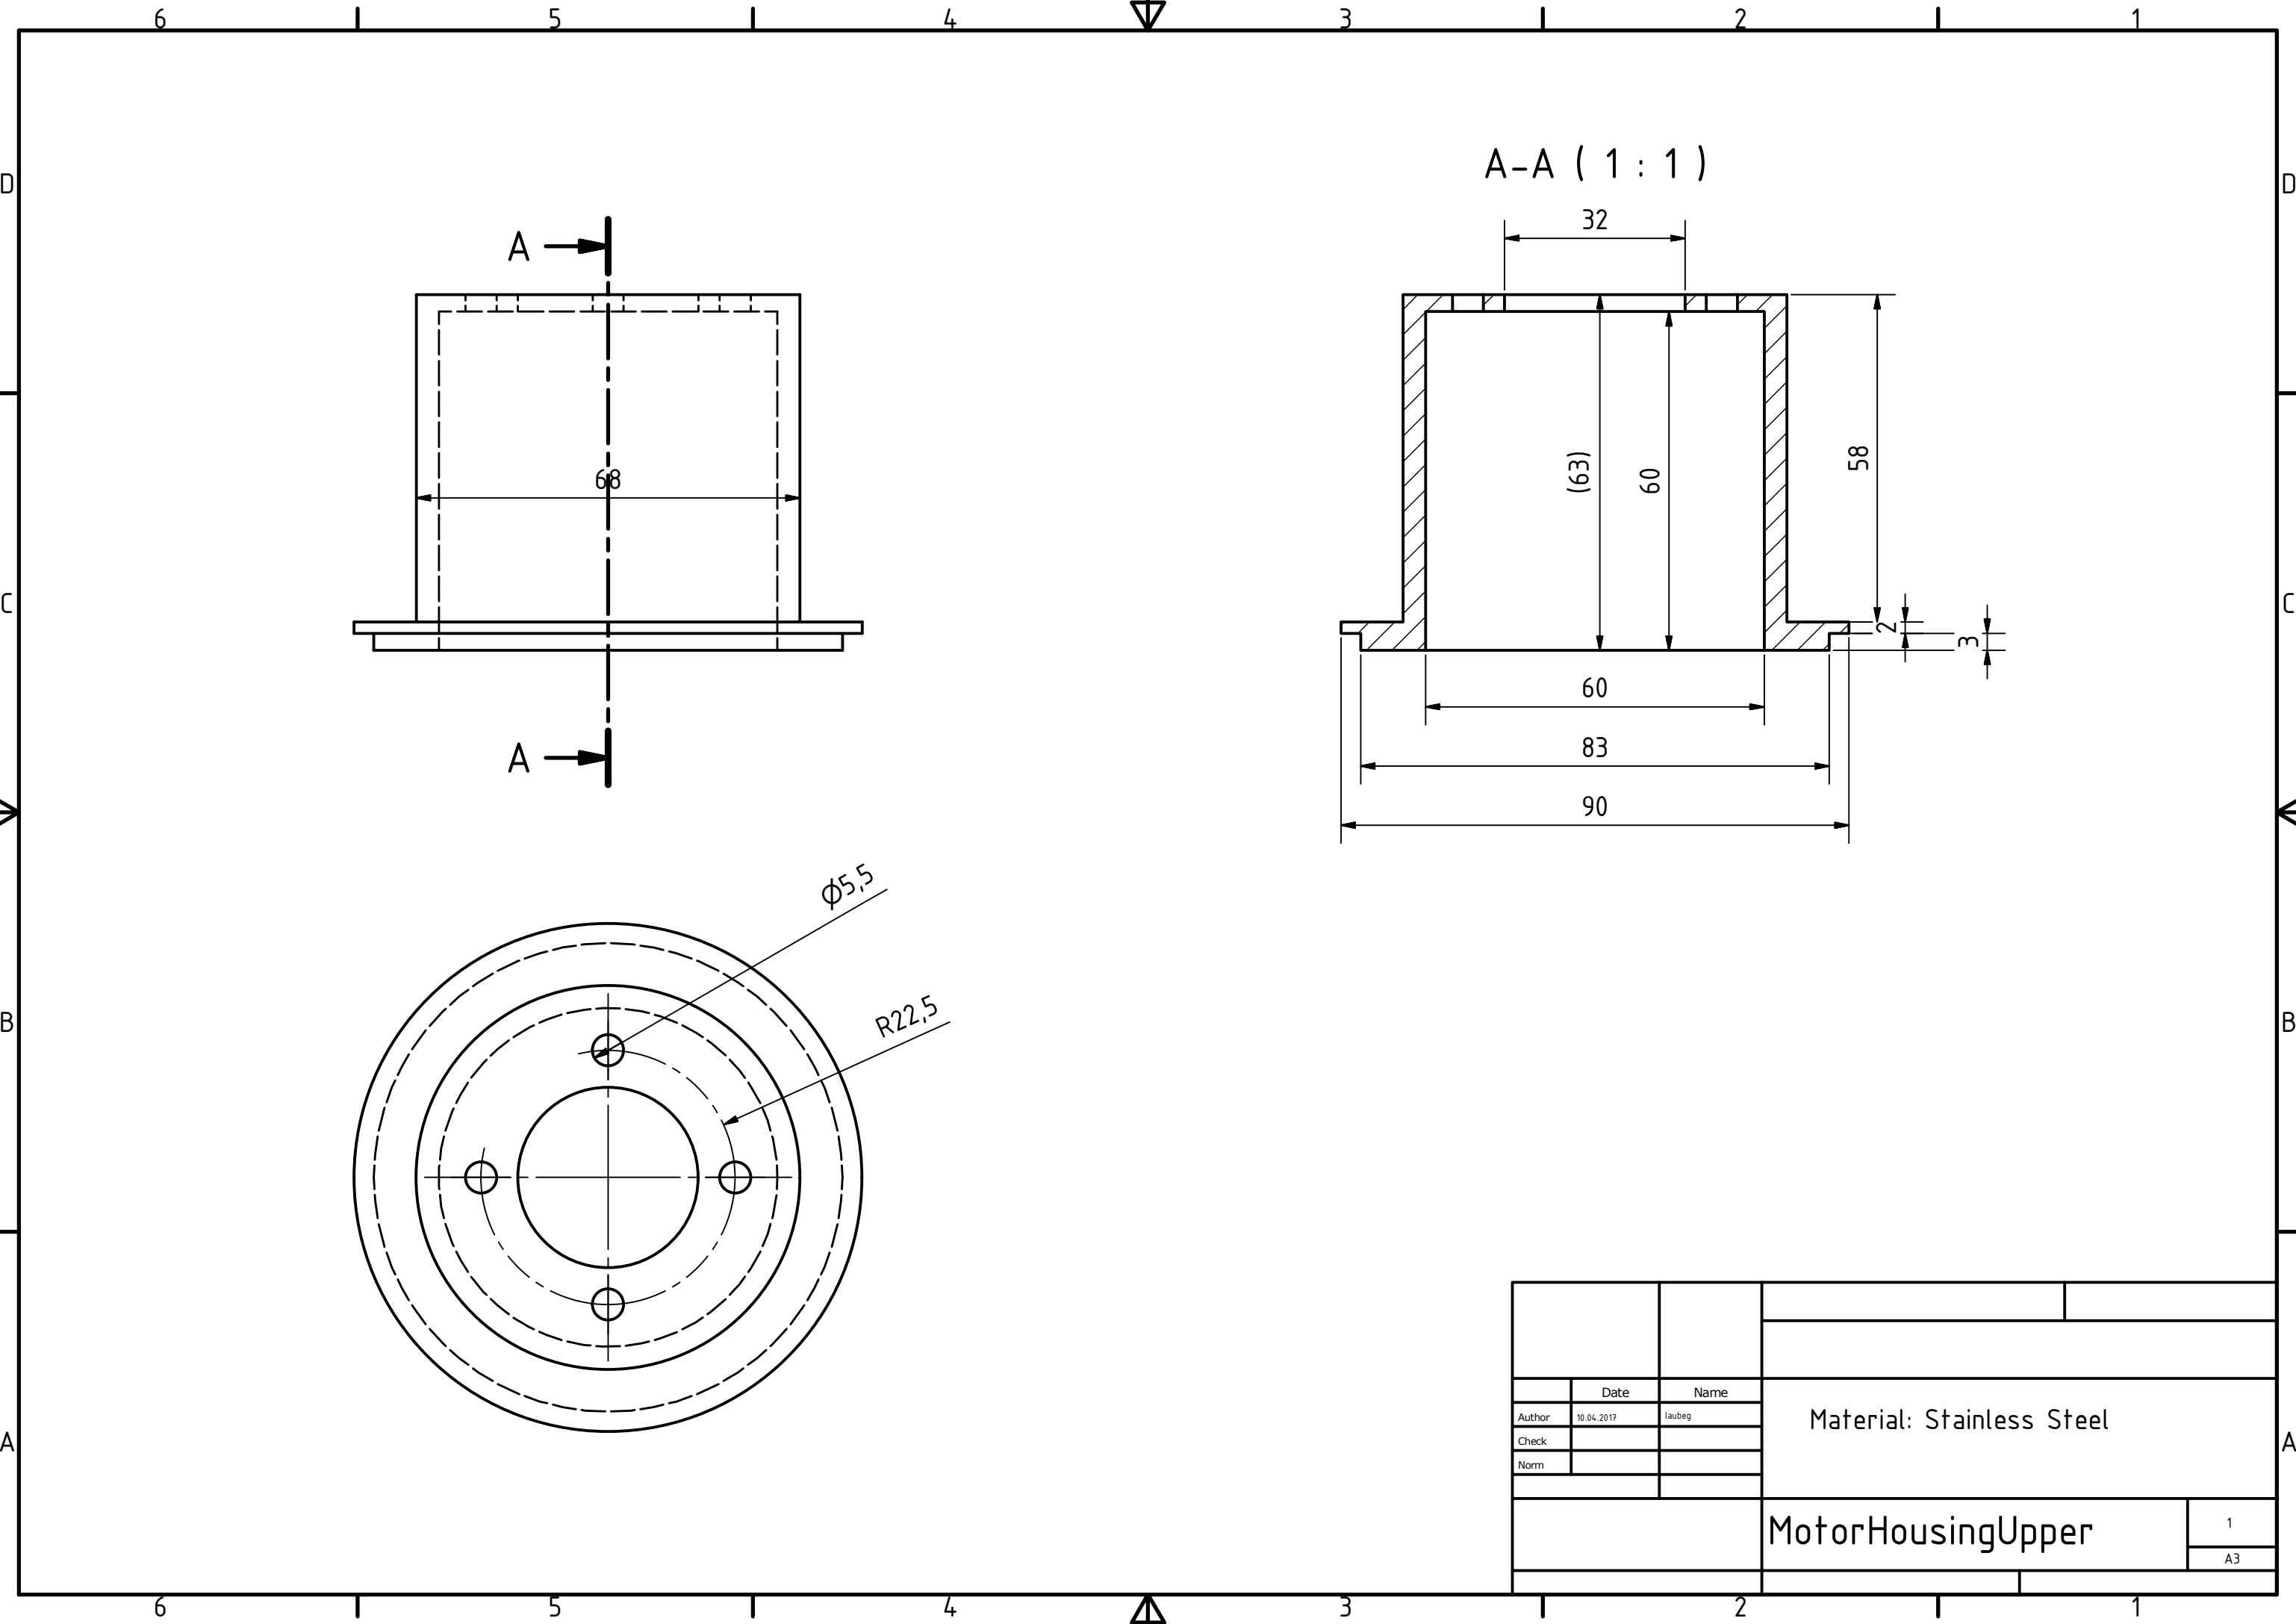

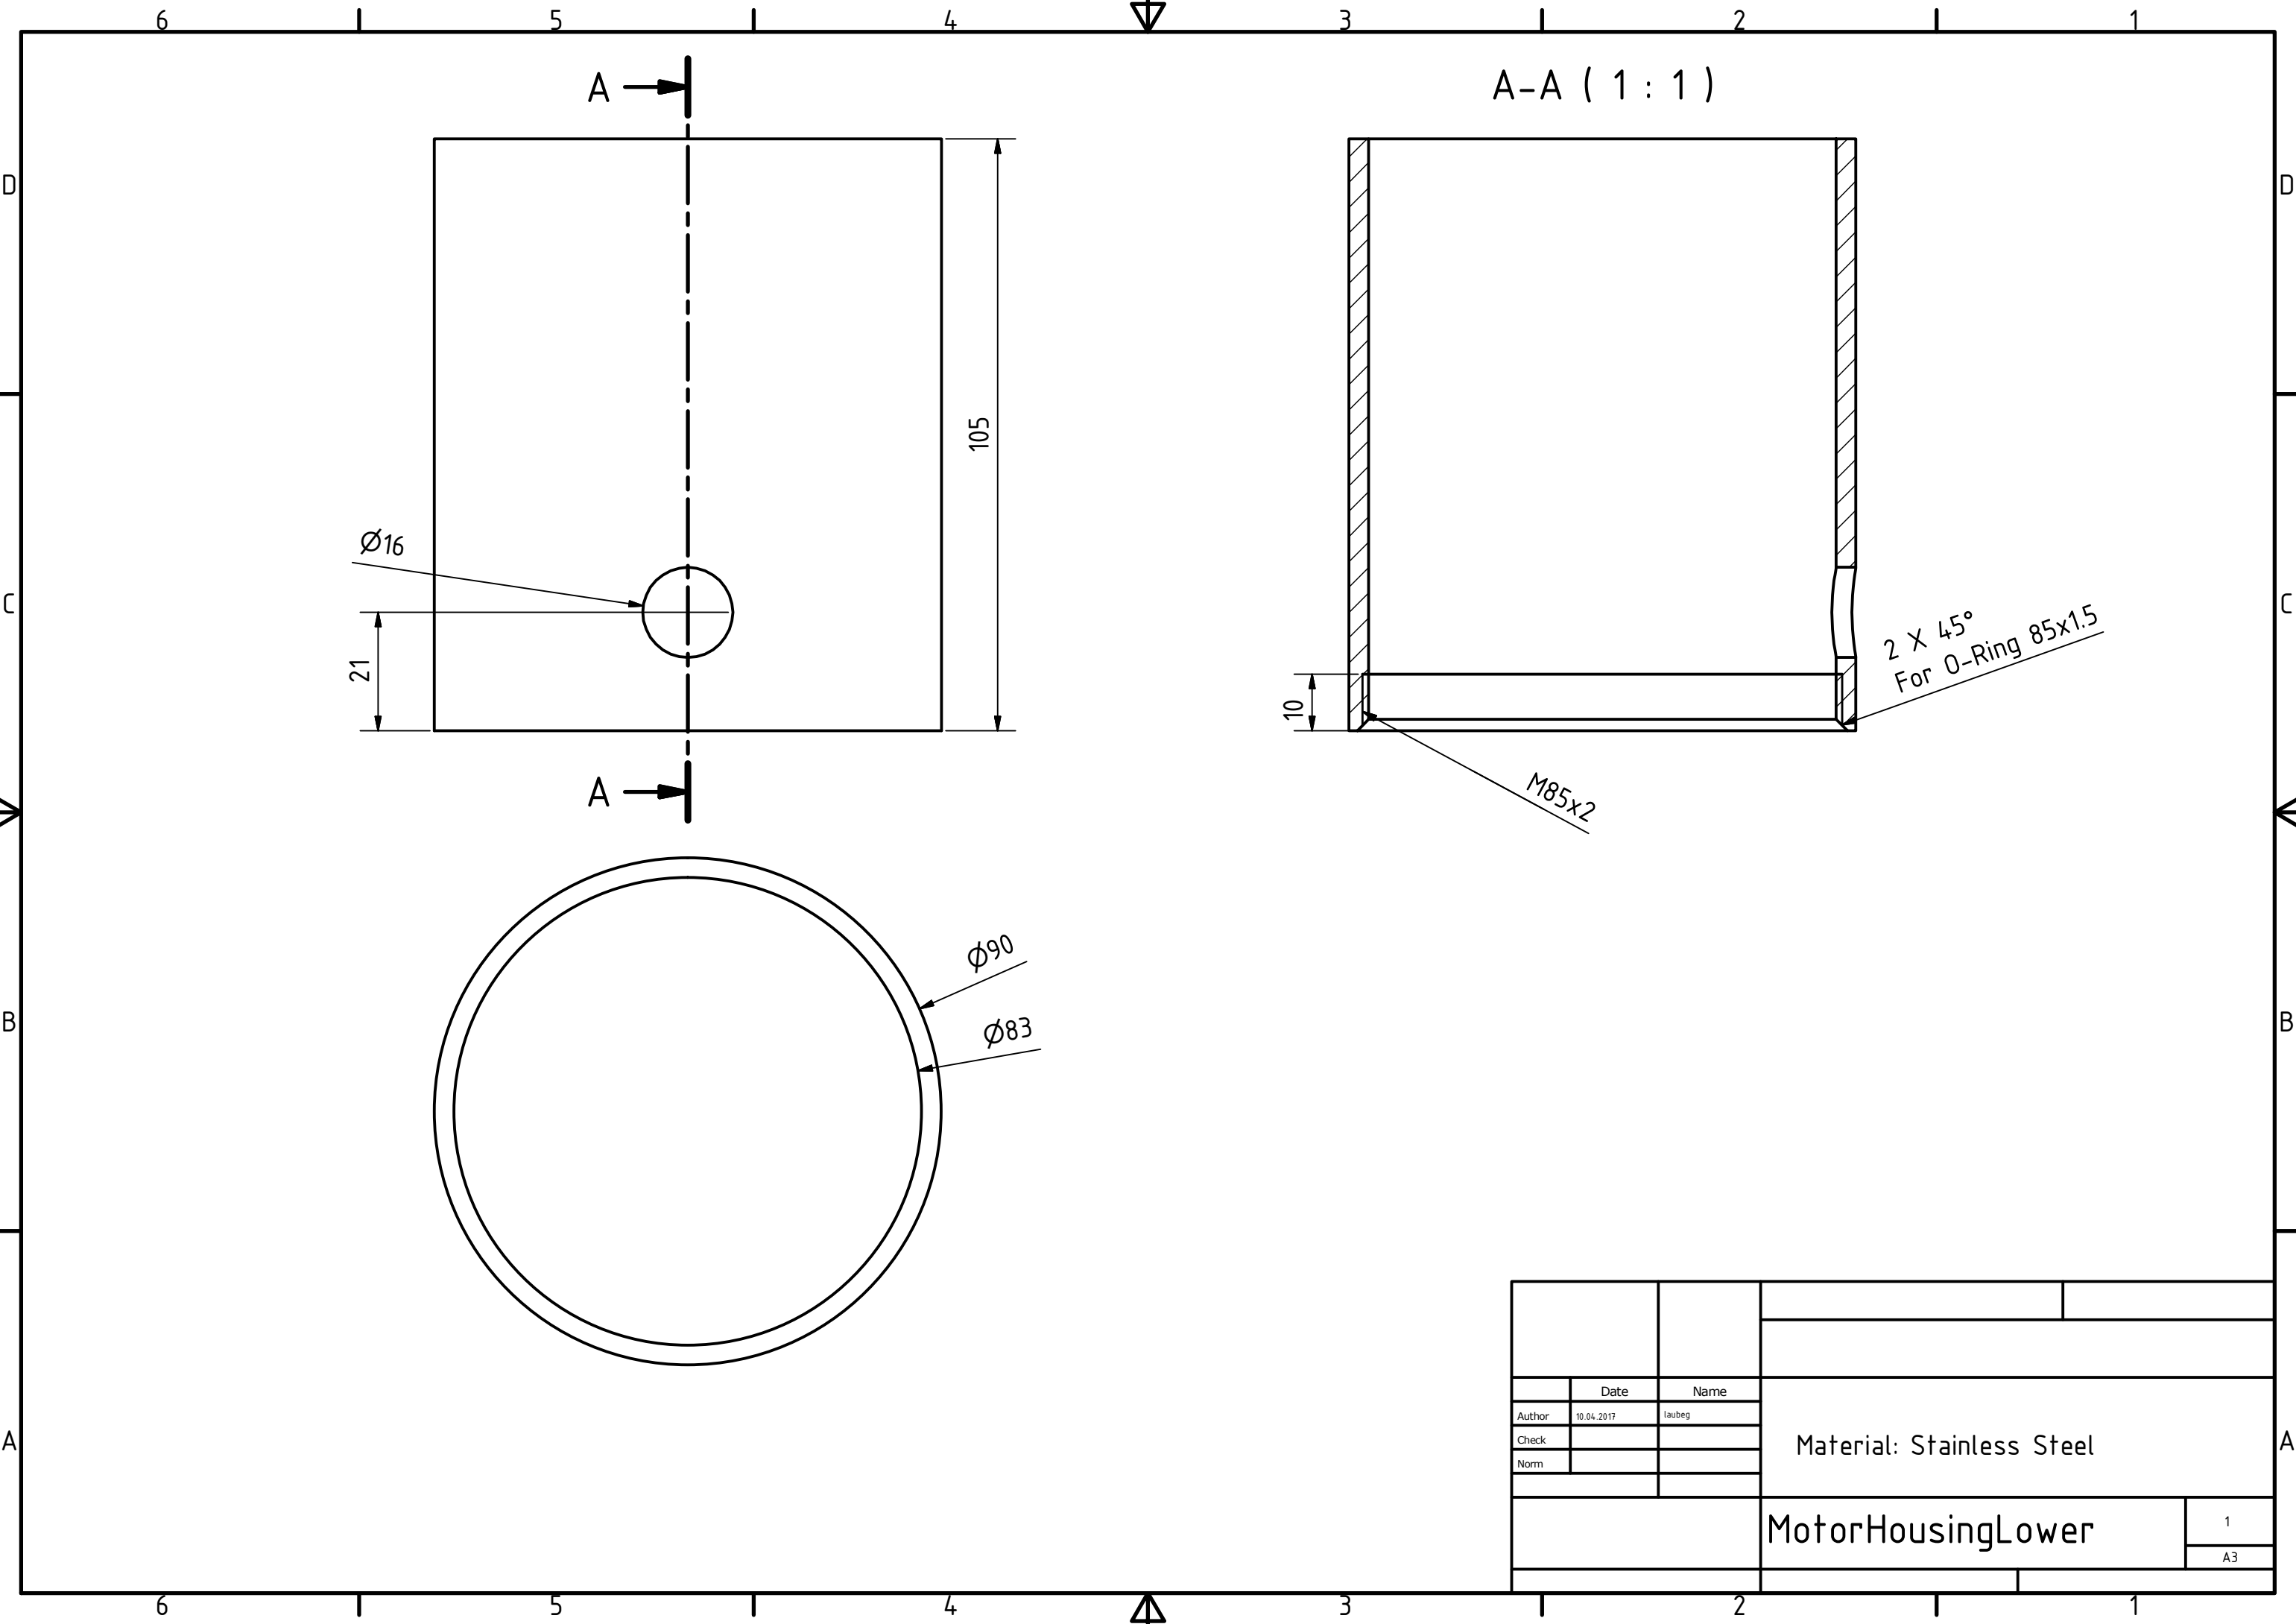

|        |            |                           |  |
|--------|------------|---------------------------|--|
|        |            |                           |  |
|        |            |                           |  |
|        | Date       | Name                      |  |
| Author | 10.04.2017 | laubeg                    |  |
| Check  |            |                           |  |
| Norm   |            |                           |  |
|        |            |                           |  |
|        |            | Material: Stainless Steel |  |
|        |            |                           |  |
|        |            | MotorHousingLower         |  |
|        |            | 1                         |  |
|        |            | A3                        |  |
