# Supplementary figures and images for: Technical note: A microcontroller-based automatic rain sampler for stable isotope studies
Source: Copernicus journal article supplement (doi:10.5194/hess-23-2637-2019), 2019-06-19

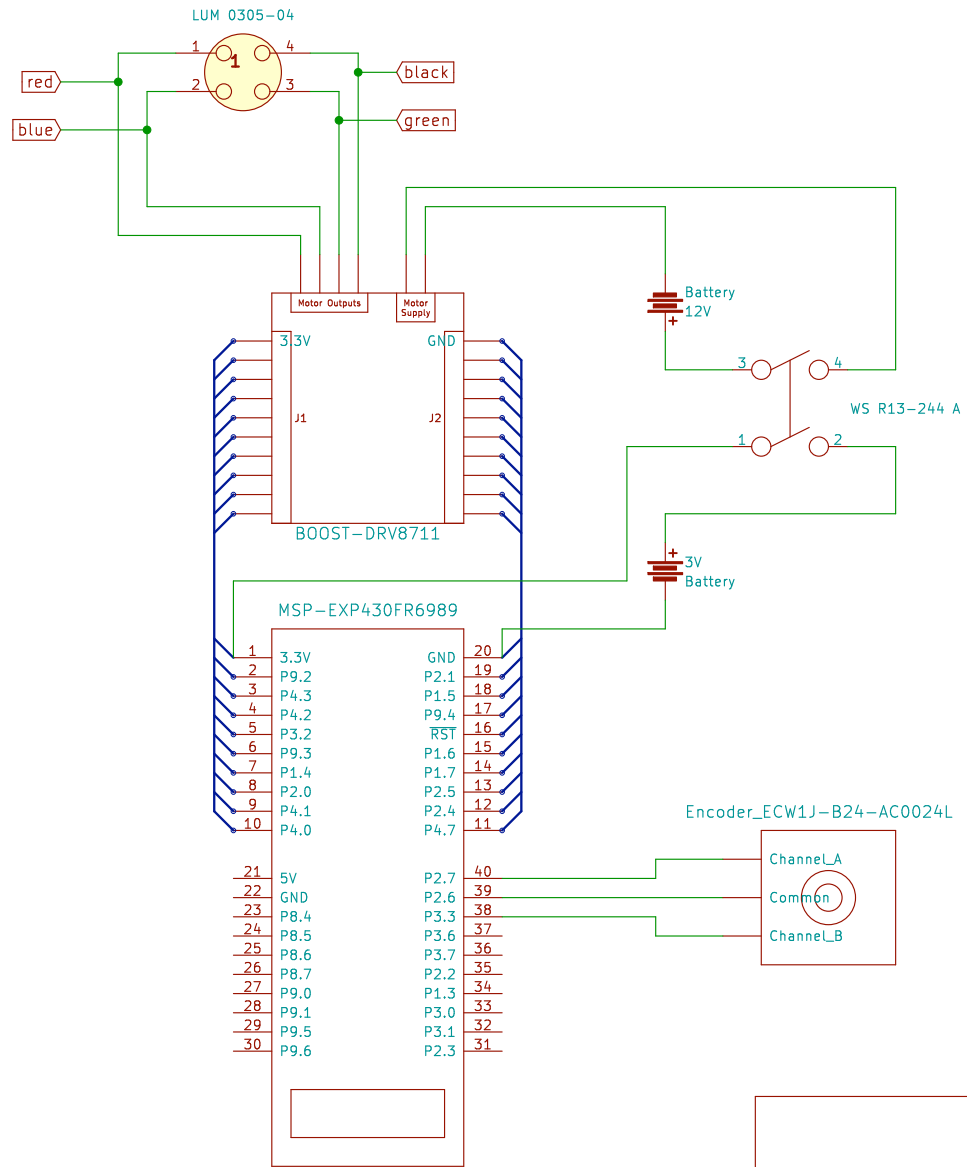

Supplement: Supplementary file 2 [file hess-23-2637-2019-supplement.zip]
